# Supplementary material for: Antagonistic role of Al3+ against PM2.5-induced neurotoxicity via suppression of NADPH oxidase-triggered oxidative stress
Source: Royal Society of Chemistry journal article supplement (doi:10.1039/d1en00954k), 2022-01-01
Supplement: d1en00954k1.pdf [file d1en00954k1.pdf]

## Supplementary Information

### **Antagonistic role of Al<sup>3+</sup> against PM<sub>2.5</sub>-induced neurotoxicity via suppression of NADPH oxidase-triggered oxidative stress**

Fang Liu,<sup>1,2</sup> Cuijuan Jiang,<sup>3</sup> Rongrong Liu,<sup>2</sup> \* Bing Yan<sup>2,3</sup> \*

<sup>1</sup> Institute of Environmental Research at Greater Bay Area, Key Laboratory for Water Quality and Conservation of the Pearl River Delta, Ministry of Education, Guangzhou University, Guangzhou 510006, China

<sup>2</sup> School of Chemistry and Chemical Engineering, Shandong University, Jinan, 250100, China

<sup>3</sup> School of Environmental Science and Engineering, Shandong University, Qingdao, 266237, China

\*To whom correspondence should be addressed.

Professor Bing Yan

E-mail: [drbingyan@yahoo.com](mailto:drbingyan@yahoo.com)

Dr. Rongrong Liu

E-mail: [liurr@gzhu.edu.cn](mailto:liurr@gzhu.edu.cn)

**Table of contents:**

**Table S1.** Content analysis of PM<sub>2.5</sub> particles.

**Figure S1.** Physicochemical properties of PM<sub>2.5</sub> particles.

**Figure S2.** Cellular uptake of PM<sub>2.5</sub> particles by SH-SY5Y cells.

**Figure S3.** Effects of PM<sub>2.5</sub> components on neurite outgrowth of HT22 cells.

**Figure S4.** Effects of the ROS inhibitors ROT, DPI and APO on ROS induction in HT22 cells.

**Table S1.** Content analysis of PM<sub>2.5</sub> particles.

| Samples              | Al <sup>3+</sup> (mg/g) | Bap (mg/g) | Pb <sup>2+</sup> (mg/g) | As(III) (mg/g) | Cr(VI) (mg/g) |
|----------------------|-------------------------|------------|-------------------------|----------------|---------------|
| GZ-PM <sub>2.5</sub> | 34.8                    | 1.01       | 5.54                    | 1.09           | 1.52          |
| CNP                  | 0.00                    | 0.00       | 0.00                    | 0.00           | 0.00          |
| C-Al                 | 32.35                   | 0.00       | 0.00                    | 0.00           | 0.00          |
| C-Bap                | 0.00                    | 1.01       | 0.00                    | 0.00           | 0.00          |
| C-Pb                 | 0.00                    | 0.00       | 4.37                    | 0.00           | 0.00          |
| C-As                 | 0.00                    | 0.00       | 0.00                    | 0.84           | 0.00          |
| C-Cr                 | 0.00                    | 0.00       | 0.00                    | 0.00           | 1.30          |
| C-Al-Bap             | 33.91                   | 1.01       | 0.00                    | 0.00           | 0.00          |
| C-Al-Pb              | 32.71                   | 0.00       | 4.37                    | 0.00           | 0.00          |
| C-Al-As              | 32.95                   | 0.00       | 0.00                    | 0.84           | 0.00          |
| C-Al-Cr              | 33.87                   | 0.00       | 0.00                    | 0.00           | 1.03          |
| C-Bap-Pb             | 0.00                    | 1.01       | 5.01                    | 0.00           | 0.00          |
| C-Bap-As             | 0.00                    | 1.01       | 0.00                    | 0.73           | 0.00          |
| C-Bap-Cr             | 0.00                    | 1.01       | 0.00                    | 0.00           | 1.10          |
| C-Pb-As              | 0.00                    | 0.00       | 5.24                    | 0.79           | 0.00          |
| C-Pb-Cr              | 0.00                    | 0.00       | 5.80                    | 0.00           | 1.38          |
| C-As-Cr              | 0.00                    | 0.00       | 0.00                    | 1.01           | 1.10          |
| C-Bap-Pb-As-Cr       | 0.00                    | 1.01       | 6.24                    | 0.89           | 1.48          |
| C-Al-Bap-Pb-As-Cr    | 32.47                   | 1.01       | 6.19                    | 0.90           | 1.49          |

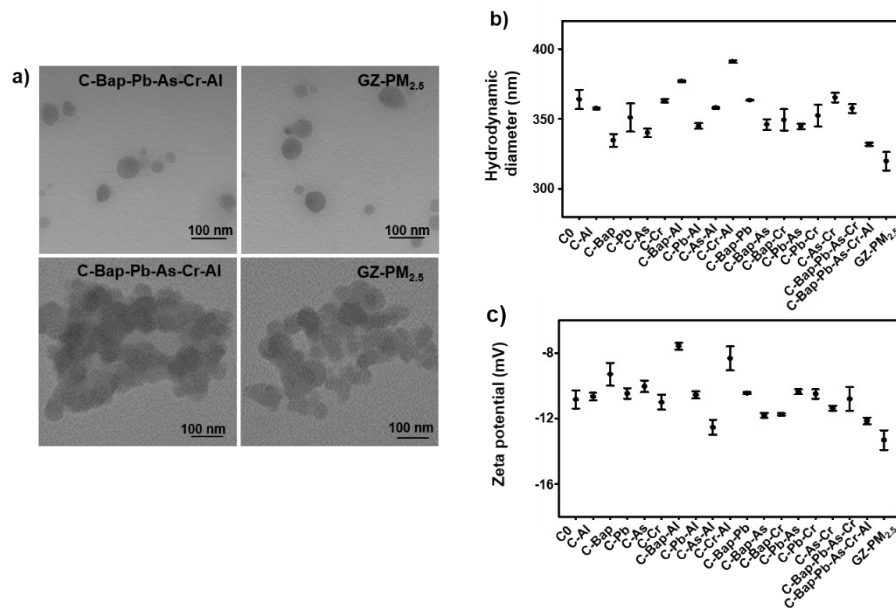

**Figure S1.** Physicochemical properties of PM<sub>2.5</sub> particles. TEM images of PM<sub>2.5</sub> and model particle **C-BaP-Pb-Cr-Al** before (lower) and after (upper) sonication (a), hydrodynamic diameters (b) and zeta potentials (c) of PM<sub>2.5</sub> and model PM<sub>2.5</sub> particles.

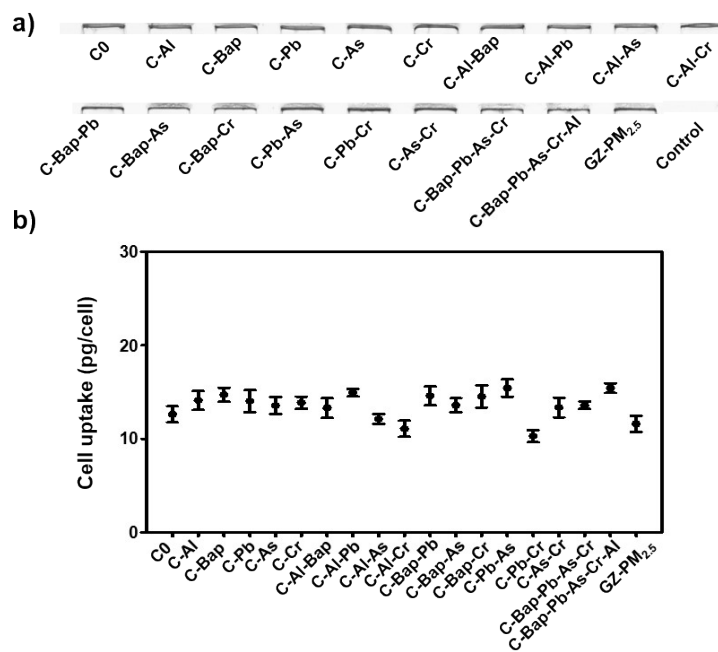

**Figure S2.** Cellular uptake of PM<sub>2.5</sub> particles by SH-SY5Y cells. Quantitative analysis of the cellular uptake of model particles and GZ-PM<sub>2.5</sub> (75  $\mu\text{g}/\text{mL}$ ) by SDS-PAGE (a, b).

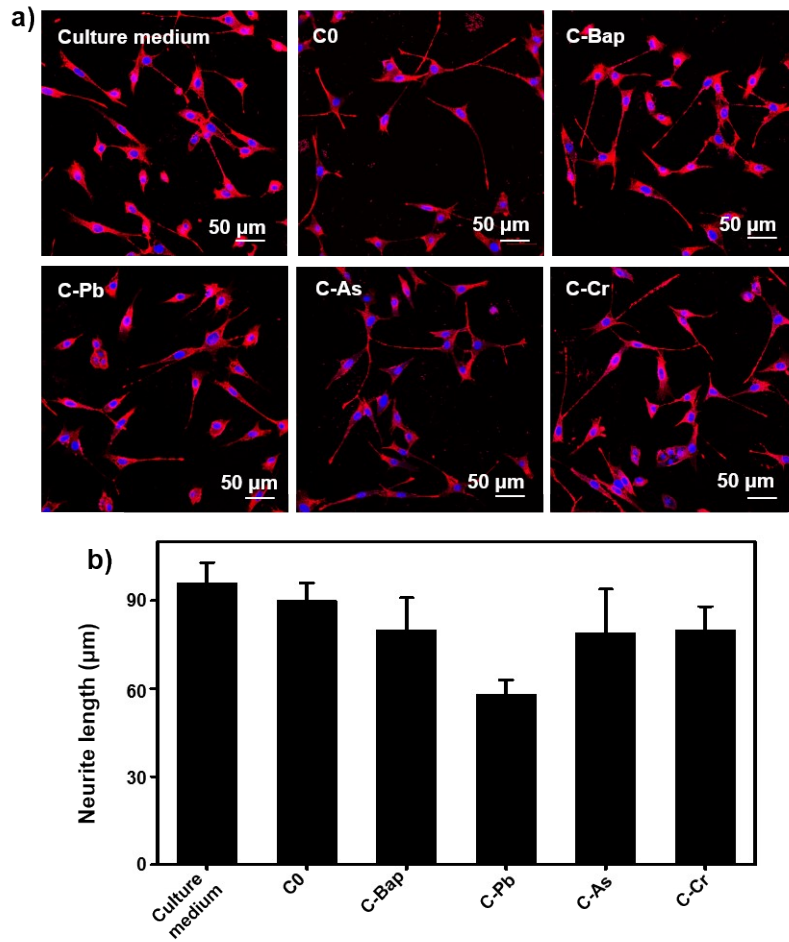

**Figure S3.** Effects of PM<sub>2.5</sub> components on neurite outgrowth of HT22 cells. Images of cell morphology obtained by LSCM (a) and changes of neurite lengths with model particles treatment (100 μg/mL) (b).

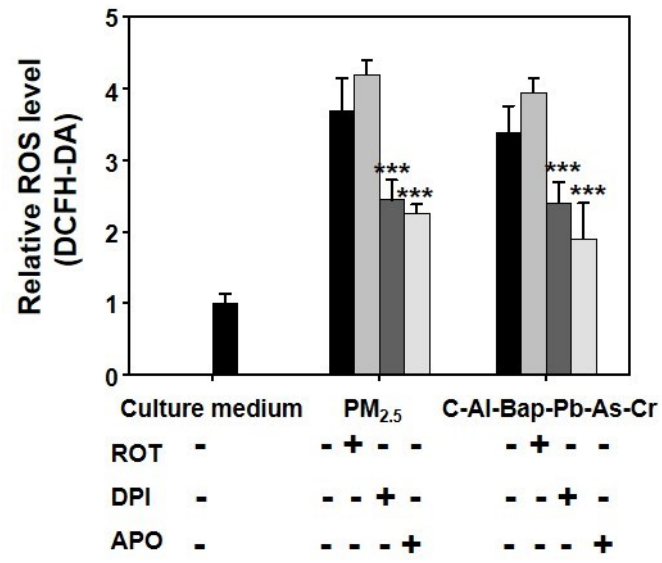

**Figure S4.** Effects of the ROS inhibitors ROT, DPI and APO on ROS induction in HT22 cells.
